# Supplementary material for: Yeast Mnn9 is both a priming glycosyltransferase and an allosteric activator of mannan biosynthesis
Source: PubMed Central journal article supplement (PMC3787745; doi:10.1098/rsob.130022), 2013-09

# Yeast Mnn9 is both a priming glycosyltransferase and an allosteric activator of mannan biosynthesis

Alexander Striebeck, David A. Robinson, Alexander W. Schuettelkopf and Daan M.

F. van Aalten

## Supplementary Figure S1

### PAGE gel of invertase of native and complemented *S. cerevisiae* $\Delta$ MNN9 strains

An 8 % PAGE gel was loaded with cell lysate from the native and complemented *S. cerevisiae* transformants indicated. The gel was stained with Coomassie brilliant blue to serve as loading control for the invertase assay gel shown in Fig. 6b.

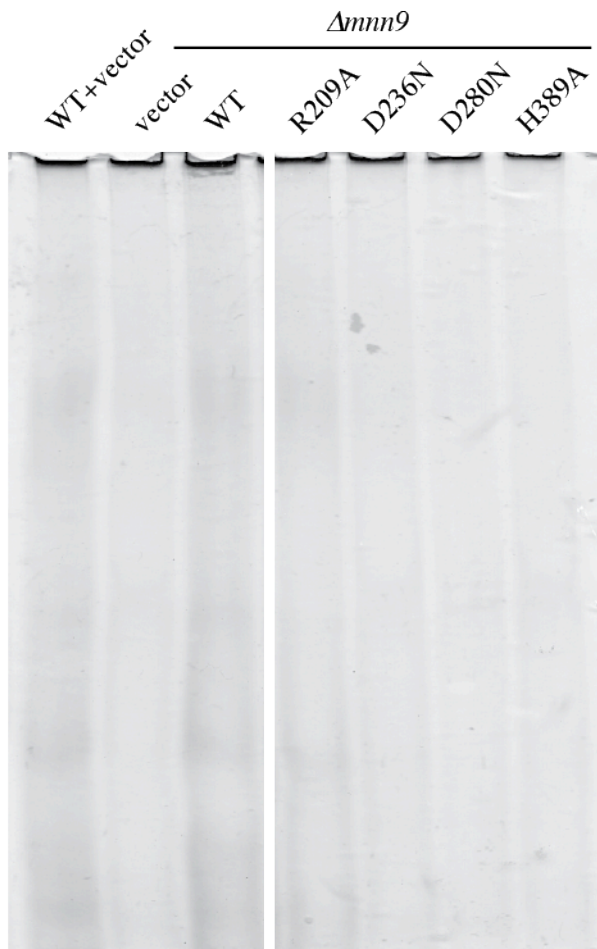

Supplement: rsob130022supp1.pdf [file rsob130022supp1.pdf]
